# Supplementary material for: Targeting CXCR4–JNK/c-Jun–CTSB Signaling Axis Attenuates Silicosis Fibrosis in Mice
Source: Research Square preprint supplement (doi:10.21203/rs.3.rs-8497777/v1), 2026-02-02
Supplement: Supplementary file 1 [file d80afce5b0553b3773c34586.docx]

**The supplementary file contains Figure S1 to S2 and Table S1 to S2**


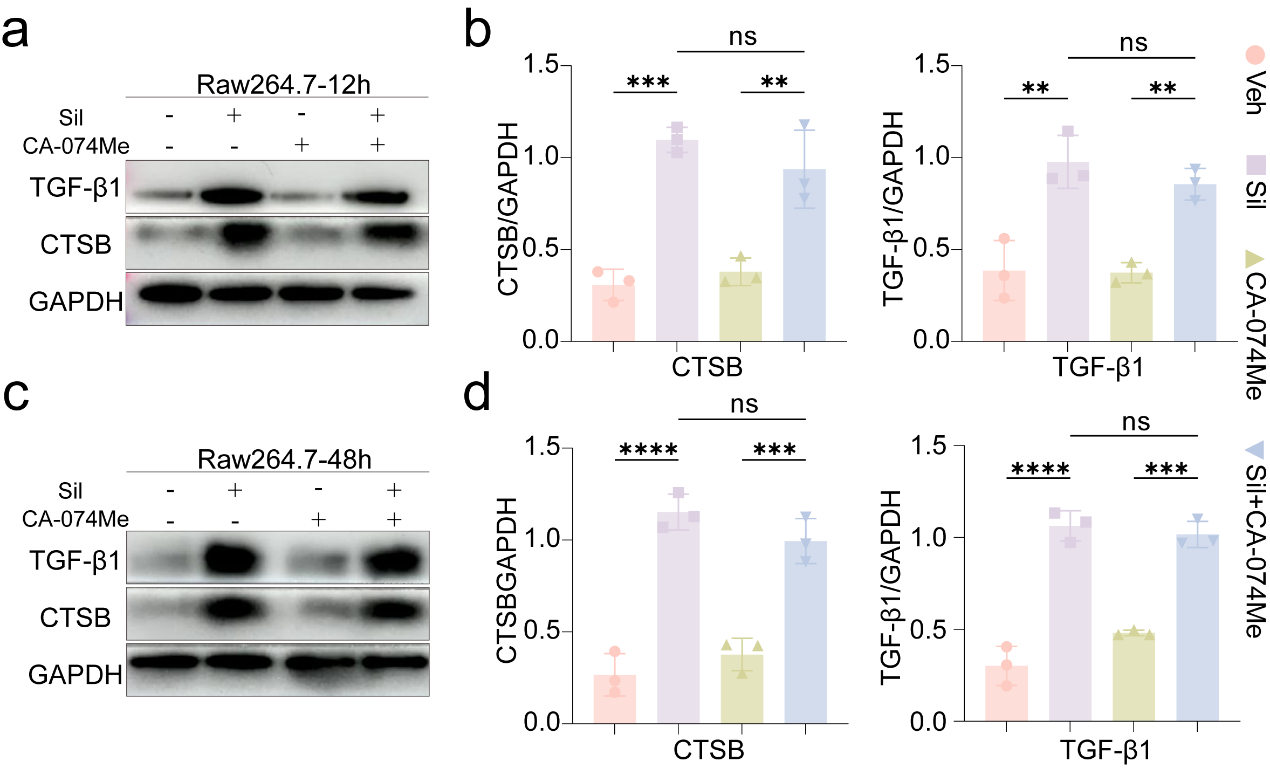


**Figure S1:** **CTSB Inhibition Effects on TGF-β1 in Silica-treated Macrophages**.

(a) Representative Western blot images showing that silica stimulated TGF-β1 expression in macrophages after 12 hours of treatment with the CTSB inhibitor CA-074Me.

(b) Quantification of CTSB and TGF-β1 protein levels in macrophages.

(c) Representative Western blot images showing that silica stimulated TGF-β1 expression in macrophages after 12 hours of treatment with the CTSB inhibitor CA-074Me.

(d) Quantification of CTSB and TGF-β1 protein levels in macrophages. Data are presented as mean ± SD (n = 3 independent experiments). Statistical significance was determined by one-way ANOVA. P > 0.05. There was no statistically significant difference.

**
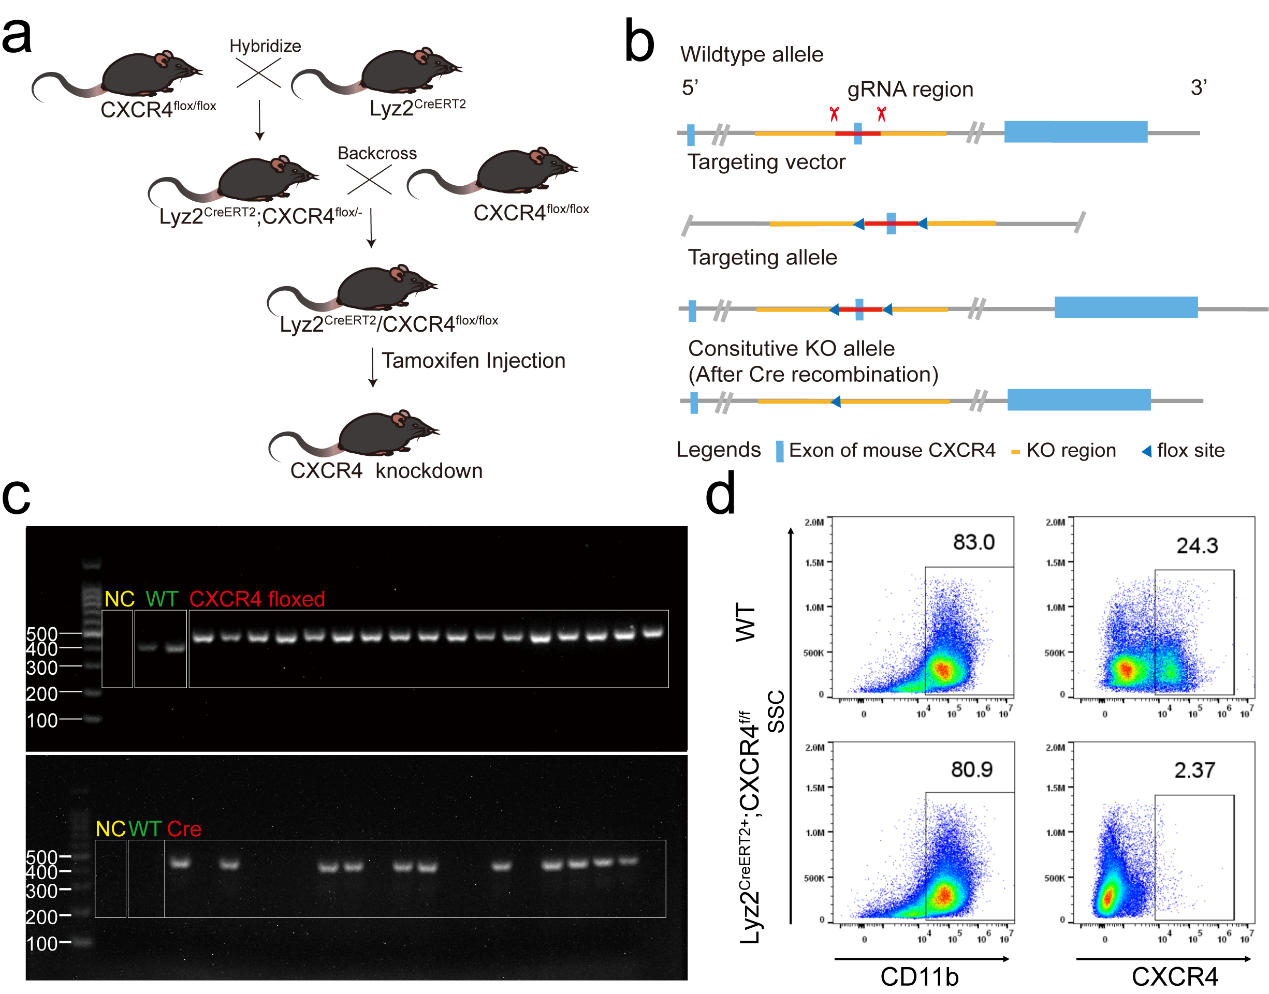
**

**Figure S2:** **Generation and Validation of CXCR4 Knockdown Mice.**

(a) Mouse Breeding Scheme: Initially, CXCR4 homozygous mice were crossed with mice harboring Cre recombinase. Based on PCR analysis, the offspring carrying Cre recombinase were selected for backcrossing with the CXCR4 homozygous mice, resulting in CXCR4 homozygous mice that also carry Cre recombinase.

(b) Gene Knockdown Mouse Model: Tamoxifen was administered to activate Cre recombinase, thereby inducing the knockdown of the CXCR4 gene and reducing its expression levels.

(c) PCR Genotyping Results: The upper panel shows a single band, indicating the CXCR4 homozygous genotype. The lower panel displays bands corresponding to the presence of Cre recombinase.

(d) Flow Cytometry Analysis of CXCR4 Expression in Myeloid Cells from Wild-type and Lyz2CreERT2+; CXCR4f/f Mice: Flow cytometry analysis was conducted to assess CXCR4 expression in myeloid cells derived from both wild-type and Lyz2CreERT2+; CXCR4f/f mice.

**Table S1：Information of antibodies used in Western blot and Immunofluorescent staining**

| Antibodies Origin Product code | | |
| --- | --- | --- |
| CXCR4 | Proteintech | 60042-1-Ig |
| C1QC | Proteintech | 16889-1-AP |
| CTSB | CST | 3178S |
| c-Jun | CST | 9165S |
| p-c-Jun | CST | 3270S |
| JNK | ZEN-BIOSCIENCE | 680353 |
| p-JNK | ZEN-BIOSCIENCE | 340810 |
| α-SMA | Proteintech | 14395-1-AP |
| TGF-β1 | Bioss | bs-0086R |
| Fibronectin | Proteintech | 66042-1-Ig |

**Table S2：Primers used for RT-qPCR analysis**

| **Gene** | **Species** | **Primer** | **Sequence (5' to 3')** |
| --- | --- | --- | --- |
| *TGF-β1* | Mouse | Forward | CAACAATTCCTGGCGTTACCTT |
| Reverse | CGAAAGCCCTGTATTCCGTCT |
| *Fibronectin* | Mouse | Forward | AGCCCTTACAGTTCCAAGTTCC |
| Reverse | TGCCCACAGTCACAACCTCTT |
| *α-SMA* | Mouse | Forward | AATGGCTCTGGGCTCTGTAA |
| Reverse | CTCTTGCTCTGGGCTTCATC |
| *GAPDH* | Mouse | Forward | AGGTCGGTGTGAACGGATTTG |
| Reverse | TGTAGACCATGTAGTTGAGGTCA |
